# Supplementary material for: Brinzolamide/brimonidine fixed-dose combination bid as an adjunct to a prostaglandin analog for open-angle glaucoma/ocular hypertension
Source: PubMed Central journal article supplement — Eur J Ophthalmol. 2019 Oct 9;31(1):103–11. doi: 10.1177/1120672119878044 (PMC7859663; doi:10.1177/1120672119878044), 2019-10-09
Supplement: Supplementary_information.pdf [file Supplementary_information.pdf]

**Appendix 1. Selection of study eye**

If both eyes were dosed, then the worse evaluable eye (defined as the eye with higher intraocular pressure (IOP) at 09:00 h averaged across the two eligibility visits) was selected as the study eye. If the IOP was the same in both eyes at 09:00 h, then the worse evaluable eye was defined as the eye with higher IOP at 11:00 h averaged across the 2 eligibility visits; if both eyes were still equal, the right eye was selected as the study eye.

**Appendix 2. Key exclusion criteria**

Key exclusion criteria were (1) Central corneal thickness  $>620$   $\mu\text{m}$  as measured by pachymetry in either eye; (2) Schaffer angle grade  $<2$  in either eye, as measured by gonioscopy; (3) Cup/disc ratio  $>0.80$  in either eye; (4) Best-corrected visual acuity (BCVA) score worse than 55 Early Treatment Diabetic Retinopathy Study letters (equivalent to  $\sim 20/80$  Snellen, 0.60 logarithm of the minimum angle of resolution, or 0.25 decimal) in either eye; (5) Severe central visual field loss in either eye or field loss threatening fixation in either eye. Severe central visual field loss was defined as a sensitivity of  $\leq 10$  dB in at least 2 of the 4 visual field test points closest to the point of fixation; (6) Hypersensitivity to  $\alpha$ -adrenergic agonists, carbonic anhydrase inhibitors, prostaglandins, sulfonamide derivatives, or to any component of the trial medications, in the opinion of the investigator.

**Appendix 3. Assessment of IOP, BCVA, perimetry, fundus and slit-lamp examination**

Two IOP measurements were taken for each eye. If the 2 measurements for the same eye differed by  $\leq 4$  mmHg, the average value was considered as the mean IOP for that eye. If the 2 measurements for the same eye differed by  $>4$  mmHg, a third measurement was taken and the two closest values were averaged. If the 3 measurements differed by equal amounts, all 3 measurements were averaged. BCVA assessments were performed at screening, eligibility, and on-therapy follow-up visits. Automated perimetry and dilated fundus examination were performed at screening and at the Week 6 follow-up visit. Automated perimetry was performed using either a Humphrey Field Analyzer or Octopus Perimeter, or other perimeters with prior approval of the Sponsor. The dilated fundus examination included assessments of vitreous, retina/macula/choroid, optic nerve, and cup/disc ratio (horizontal and vertical axis) for both eyes. Slit-lamp biomicroscopy examination

included assessment of the aqueous cells and flare and the lens and the examination was conducted prior to IOP measurements or instillation of fluorescein.

**Appendix 4:** Results for changes in blood pressure, visual acuity, perimetry, slit lamp biomicroscopy

Mean changes in systolic blood pressure (SBP) and diastolic blood pressure (DBP) were small in the BBFC+PGA (SBP  $\leq$ 7.7 mmHg, DBP  $\leq$ 3.1 mmHg) and vehicle+PGA group (SBP  $\leq$ 3.1 mmHg, DBP  $\leq$ 1.6 mmHg). Mean changes in pulse in both treatment groups at any time point after dosing were also small ( $<$ 2.1 beats per minute).

Mean visual acuity at Eligibility 2 visit (baseline) was similar in both the groups (BBFC+PGA 81.5 letters; vehicle+PGA 81.6 letters). The mean change in visual acuity from baseline was also similar between BBFC+PGA and vehicle+PGA groups at Week 2 (both  $-1.2$  letters) and Week 6 ( $-0.9$  letters and  $-0.8$  letters respectively). At baseline, the mean defect (measured using an Octopus Field Analyzer) was 3.24 (BBFC+PGA) and 0.96 (vehicle +PGA), which decreased at Week 6 by 0.31 (BBFC+PGA) and 0.57 (vehicle+PGA). The two groups also showed a comparable change in mean deviation from baseline (BBFC+PGA  $-3.86$ ; vehicle+PGA  $-3.42$ ) to Week 6 (mean change: BBFC+PGA 1.308; vehicle+PGA 1.017) as measured with a Humphrey analyzer.

There were no differences between the groups for slit-lamp biomicroscopy (no worsening of slit lamp parameters like aqueous flare and status of lens in any patient). One patient experienced a faint aqueous flare on an unscheduled visit and withdrew from the treatment due to intolerable hyperemia.

**Supplementary Table 1.** Mean IOP and mean reduction in IOP (mmHg) from baseline at each visit by time point and mean diurnal IOP at Week 6 in patients with 16:00 h data (full analysis set)

| Visit                 | Time point | BBFC+PGA    |                       | Vehicle+PGA |                       |
|-----------------------|------------|-------------|-----------------------|-------------|-----------------------|
|                       |            | N=95        |                       | N=92        |                       |
|                       |            | IOP         | IOP Reduction         | IOP         | IOP Reduction         |
|                       |            | Mean (SD)   | Mean (SD)             | Mean (SD)   | Mean (SD)             |
| <sup>a</sup> Baseline | 09:00      | 23.9 (1.99) | –                     | 24.0 (1.99) | –                     |
|                       | 11:00      | 22.7 (2.54) | –                     | 23.0 (2.60) | –                     |
|                       | 16:00      | 21.9 (2.44) | –                     | 22.1 (2.85) | –                     |
| Week 2                | 09:00      | 19.1 (3.90) | 4.7 (3.25)            | 22.4 (3.25) | 1.5 (2.47)            |
|                       | 11:00      | 16.4 (3.27) | 6.3 (3.12)            | 21.1 (3.55) | 1.9 (2.56)            |
|                       | 16:00      | 16.7 (3.01) | 5.2 (2.88)            | 20.5 (3.63) | 1.6 (2.56)            |
| Week 6                | 09:00      | 19.3 (3.51) | 4.6 (3.02)            | 21.1 (3.68) | 2.9 (3.02)            |
|                       | 11:00      | 15.7 (3.69) | 7.0 (3.37)            | 20.3 (3.62) | 2.7 (2.91)            |
|                       | 16:00      | 17.2 (3.06) | 4.9 (2.75)            | 19.9 (3.87) | 2.2 (3.19)            |
|                       |            | Diurnal IOP | Diurnal IOP reduction | Diurnal IOP | Diurnal IOP reduction |
|                       |            | Mean (SD)   | Mean (SD)             | Mean (SD)   | Mean (SD)             |
| <sup>b</sup> Baseline | –          | 22.7 (2.02) | –                     | 22.9 (2.26) | –                     |
| Week 6                | –          | 17.4 (3.06) | 5.3 (2.46)            | 20.4 (3.48) | 2.4 (2.59)            |

<sup>a</sup>Baseline is defined as the average of the 9:00-h, 11:00-h and 16:00-h values at both eligibility visits for 09:00-h, 11:00-h and 16:00-h calculations, respectively.

<sup>b</sup>Baseline is defined as the average of the 9:00-h and 11:00-h values at both eligibility visits.

BBFC, brinzolamide 1%/brimonidine 0.2% fixed-dose combination; N, number of patients; PGA, prostaglandin analog; SD, standard deviation.

**Supplementary Table 2.** Mean change from baseline in ocular perfusion pressure (mmHg) at individual time points and at Week 6 (full analysis set)

| Visit                 | Time point | BBFC+PGA    |                 | Vehicle+PGA |                 |
|-----------------------|------------|-------------|-----------------|-------------|-----------------|
|                       |            | N=95        |                 | N=92        |                 |
|                       |            | OPP         | Increase in OPP | OPP         | Increase in OPP |
|                       |            | Mean (SD)   | Mean (SD)       | Mean (SD)   | Mean (SD)       |
| <sup>a</sup> Baseline | 09:00      | 48.4 (6.53) | –               | 49.5 (7.07) | –               |
|                       | 11:00      | 48.4 (7.00) | –               | 49.5 (6.86) | –               |
| Week 6                | 09:00      | 51.0 (7.32) | 2.5 (5.22)      | 50.2 (7.72) | 0.6 (4.40)      |
|                       | 11:00      | 49.9 (7.84) | 1.4 (4.76)      | 49.5 (7.79) | 0.2 (4.52)      |
|                       |            | OPP         | Increase in OPP | OPP         | Increase in OPP |
|                       |            | Mean (SD)   | Mean (SD)       | Mean (SD)   | Mean (SD)       |
| <sup>b</sup> Baseline | –          | 48.2 (6.52) | –               | 49.4 (6.72) | –               |
| Week 6                | –          | 50.7 (7.11) | 2.4 (4.30)      | 50.1 (7.49) | 0.6 (3.74)      |

<sup>a</sup>Baseline is defined as the average of the 09:00-h, 11:00-h values at both eligibility visits for 09:00-h, 11:00-h calculations, respectively

<sup>b</sup>Baseline is defined as the average of the 09:00-h and 11:00-h values at both eligibility visits

At each time point, only subjects with a value at both baseline and that time point are included in the calculation of change

BBFC, brinzolamide 1%/brimonidine 0.2% fixed-dose combination; N, total number of patients; PGA, prostaglandin analog; SD, standard deviation.

**Supplementary Table 3: Treatment-related AEs (safety set)**

| Preferred term          | BBFC+PGA<br>N=95 | Vehicle+PGA<br>N=92 |
|-------------------------|------------------|---------------------|
| <b>Any event, n (%)</b> | 22 (23.2)        | 4 (4.3)             |
| Dry mouth               | 5 (5.3)          | 0 (0.0)             |
| Conjunctival hyperemia* | 4 (4.2)          | 1 (1.1)             |
| Ocular hyperemia*       | 4 (4.2)          | 0 (0.0)             |
| Eye irritation          | 3 (3.2)          | 0 (0.0)             |
| Ocular discomfort       | 3 (3.2)          | 0 (0.0)             |
| Vision blurred          | 2 (2.1)          | 2 (2.2)             |
| Dry eye                 | 2 (2.1)          | 0 (0.0)             |
| Fatigue                 | 2 (2.1)          | 0 (0.0)             |
| Eye allergy             | 1 (1.1)          | 1 (1.1)             |
| Blepharitis             | 1 (1.1)          | 0 (0.0)             |
| Conjunctivitis allergic | 1 (1.1)          | 0 (0.0)             |
| Eye pruritus            | 1 (1.1)          | 0 (0.0)             |
| Eyelid edema            | 1 (1.1)          | 0 (0.0)             |
| Punctate keratitis      | 1 (1.1)          | 0 (0.0)             |
| Dizziness               | 1 (1.1)          | 0 (0.0)             |
| Dysgeusia               | 1 (1.1)          | 0 (0.0)             |
| Headache                | 1 (1.1)          | 0 (0.0)             |
| Lacrimation increased   | 0 (0.0)          | 1 (1.1)             |

The AEs are arranged in decreasing order of incidence in the BBFC+PGA group

\*Based on the judgement of the investigator

AE, adverse event; BBFC, brinzolamide 1%/brimonidine 0.2% fixed-dose combination; N, total number of patients; PGA, prostaglandin analog

**Supplementary Figure 1.** Percentage of patients reaching IOP (mmHg) target at Week 6 (full analysis set)

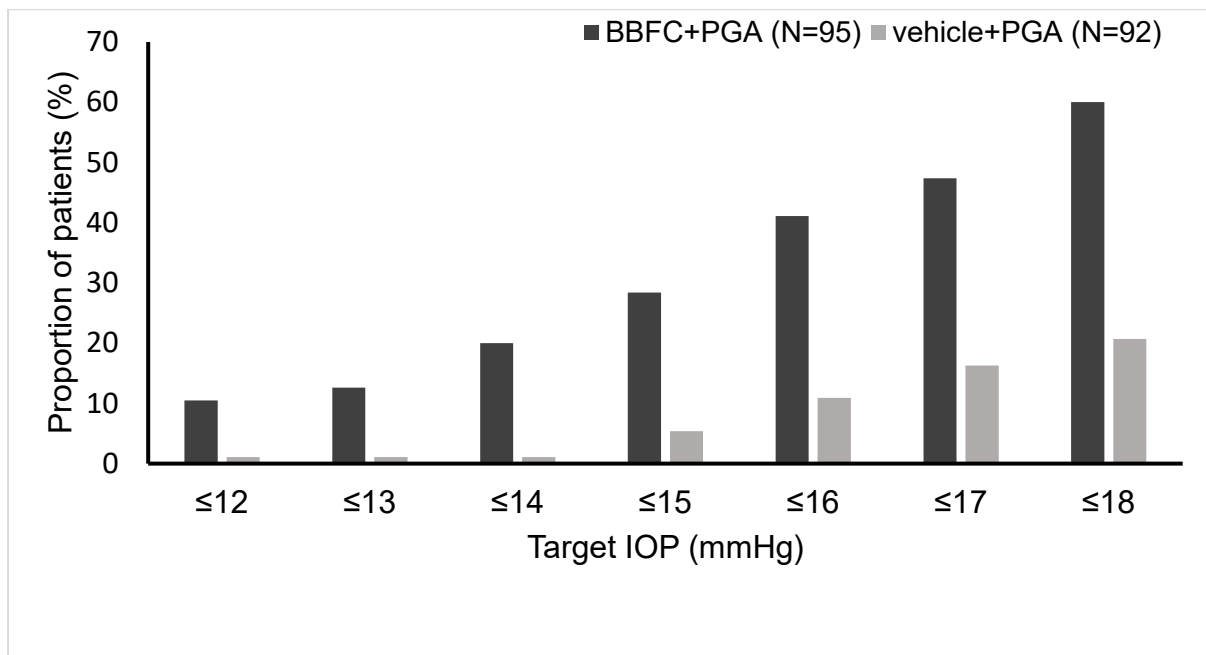

IOP target categories are cumulative

BBFC, brinzolamide 1%/brimonidine 0.2% fixed-dose combination; IOP, intraocular pressure; N, total number of patients; PGA, prostaglandin analog
